# Supplementary material for: Comparative survey of the relative impact of mRNA features on local ribosome profiling read density
Source: PubMed Central journal article supplement (PMC5059445; doi:10.1038/ncomms12915), 2016-10-04
Supplement: ncomms12915-s1.pdf [file ncomms12915-s1.pdf]

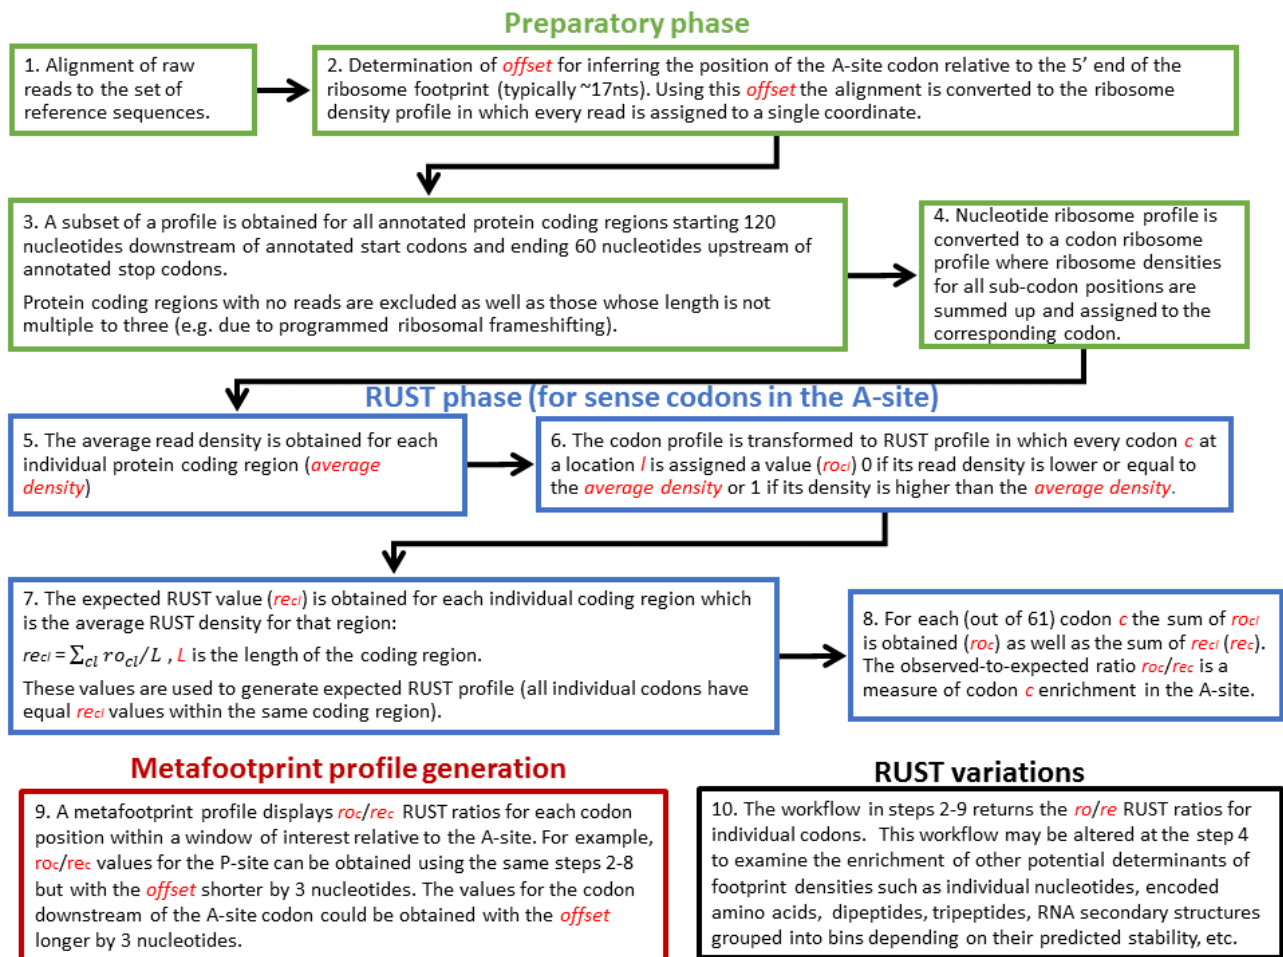

## Supplementary Figure 1. RUST pipeline

Steps 2-8 describe the pipeline for the analysis of the codon enrichment at the ribosome A-site.

Metafootprint box (bottom left) explains how the pipeline needs to be altered to obtain the data for other positions in mRNA (also see Supplementary Fig. 3 for more details) and RUST variations box (bottom right) explains how to alter the pipeline to analyse determinants of footprint density other than codons.

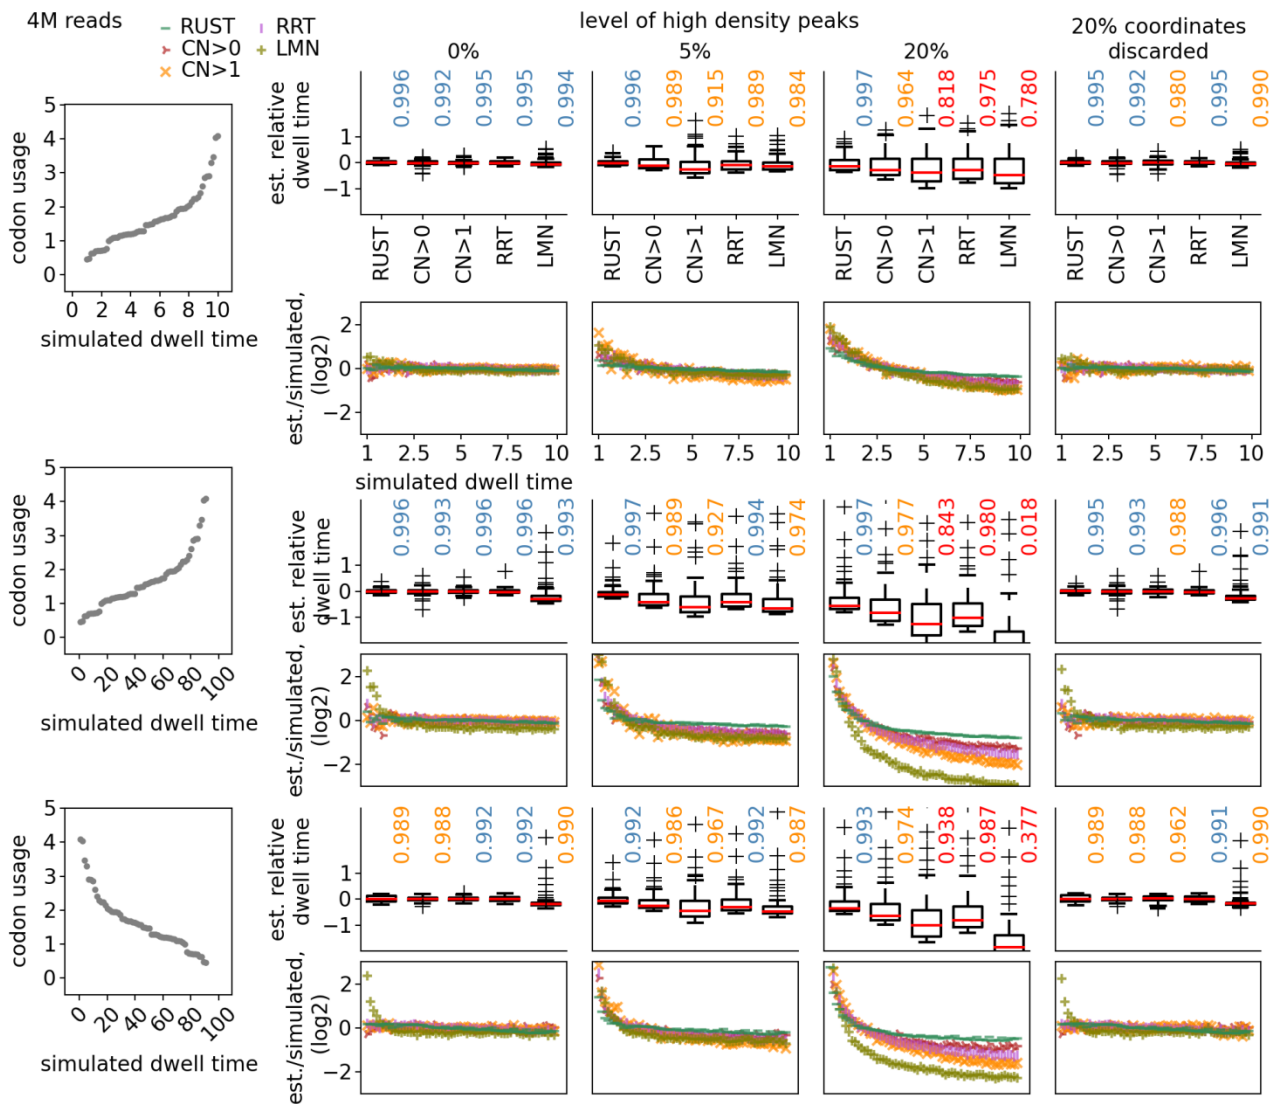

### Supplementary Figure 2. Comparison of different normalization approaches

Relationship between the estimated and simulated codon dwell times on a simulated ribosome profiling datasets with five approaches; RUST, CN of all expressed transcripts (CN>0) CN of transcripts with average transcript density >1/nucleotide (CN>1) RRT and LMN. The simulations are shown using three different input parameters; 1) the simulated dwell time correlates positively with codon usage and spans 1 order of magnitude, 2) the dwell time correlates positively with codon usages and spans 2 orders of magnitudes and 3) the dwell time correlates negatively with codon usage and spans 2 orders magnitudes. For each simulation, the distribution of the normalized ratio of the simulated and estimated relative dwell time is displayed (top) as is their coefficient of determination. The estimated/simulated (est./simulated) relative dwell times of individual codons, ordered from quickest (left) to slowest (right) dwell times, is shown in the bottom subpanel.

**i) profile of A-site of ribo-seq reads to transcript**

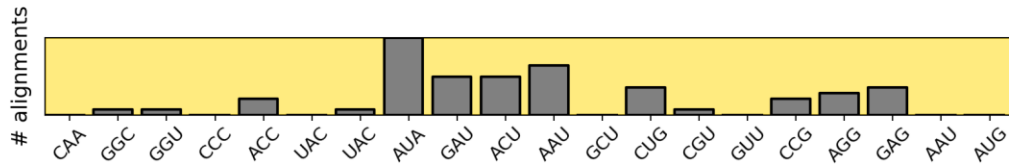

**ii) RUST profile**

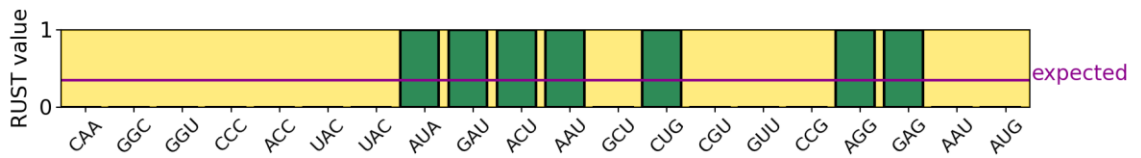

**iii) apply RUST value to codons -40 to +20**

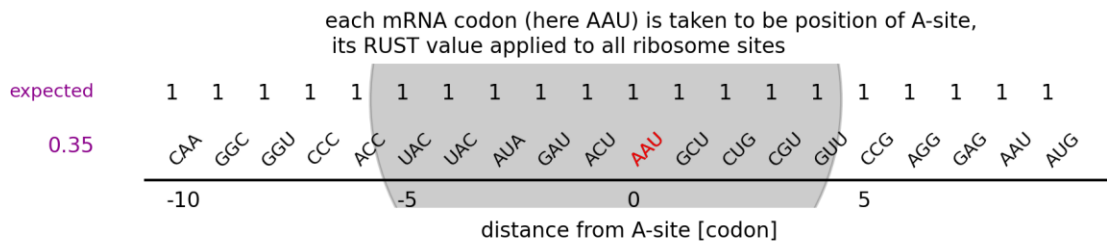

**iv) position specific weight matrix of RUST values for 61 sense codons**

|          |                              |     |      |      |      |      |      |      |      |      |      |     |
|----------|------------------------------|-----|------|------|------|------|------|------|------|------|------|-----|
| AAA      | 0.08                         | ... | 0.05 | 0.06 | 0.05 | 0.03 | 0.15 | 0.07 | 0.06 | 0.07 | 0.06 | ... |
| .        |                              |     | .    | .    | .    | .    | .    | .    | .    | .    | .    |     |
| .        |                              |     | .    | .    | .    | .    | .    | .    | .    | .    | .    |     |
| TTT      | 0.08                         | ... | 0.08 | 0.07 | 0.1  | 0.1  | 0.03 | 0.09 | 0.08 | 0.08 | 0.08 | ... |
| expected |                              |     | -5   | -4   | -3   | -2   | -1   | 0    | 1    | 2    | 3    |     |
|          | distance from A-site [codon] |     |      |      |      |      |      |      |      |      |      |     |

**Supplementary Figure 3. A diagram explaining generation of RUST metafootprint profiles for codons.** i) ribo-seq (or RNA-seq) reads of fixed length are mapped to each transcript with an offset applied to indicate the position of the A-site codon (Preparatory phase in Supplementary Fig. 1). ii) The profile is converted to a binary profile by the RUST protocol with the average RUST value for the transcript taken to be the expected value (RUST phase in Supplementary Fig. 1). iii) For each individual coding region the observed RUST values are calculated for each location within 60 codon window, from -40 codons to +20 codons. iv) The summative values are obtained for each codon at a position within a window across all windows in all coding regions as well as corresponding average expected RUST values which are not position specific. The observed-to-expected RUST ratio at a specific location indicates whether a particular codon is enriched or depleted. This allows to measure the effect of a codon at a specific location on footprint density.

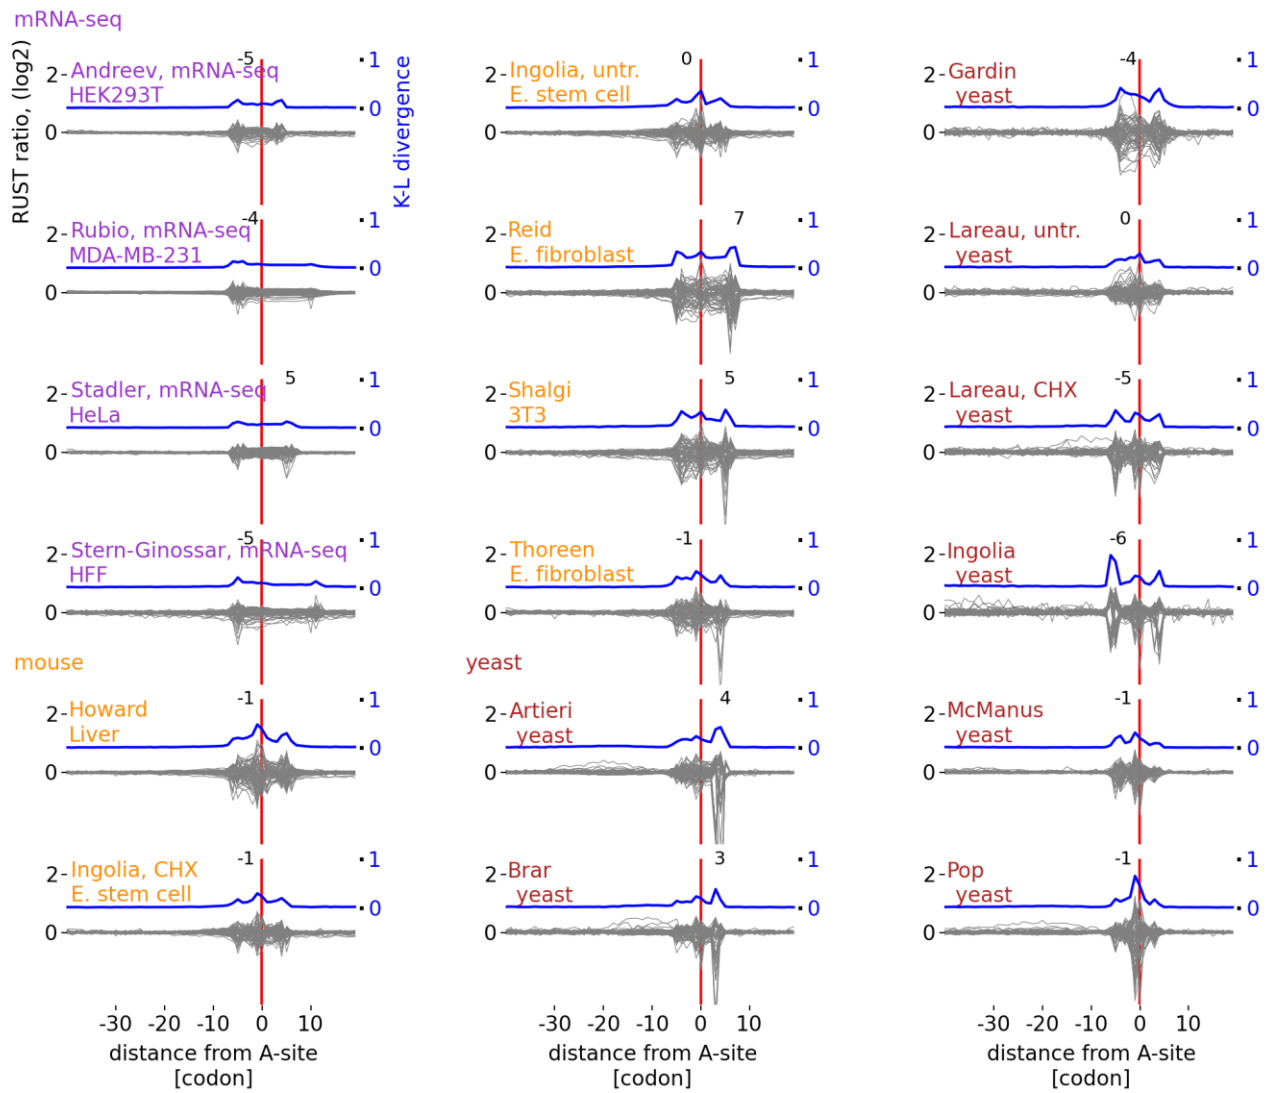

**Supplementary Figure 4. Metafootprint profiles of the human mRNA-seq mouse and yeast ribo-seq data.** The K-L divergence is shown in blue, the coordinate of K-L maximum is also indicated in each plot. E. used as abbreviation of embryonic.

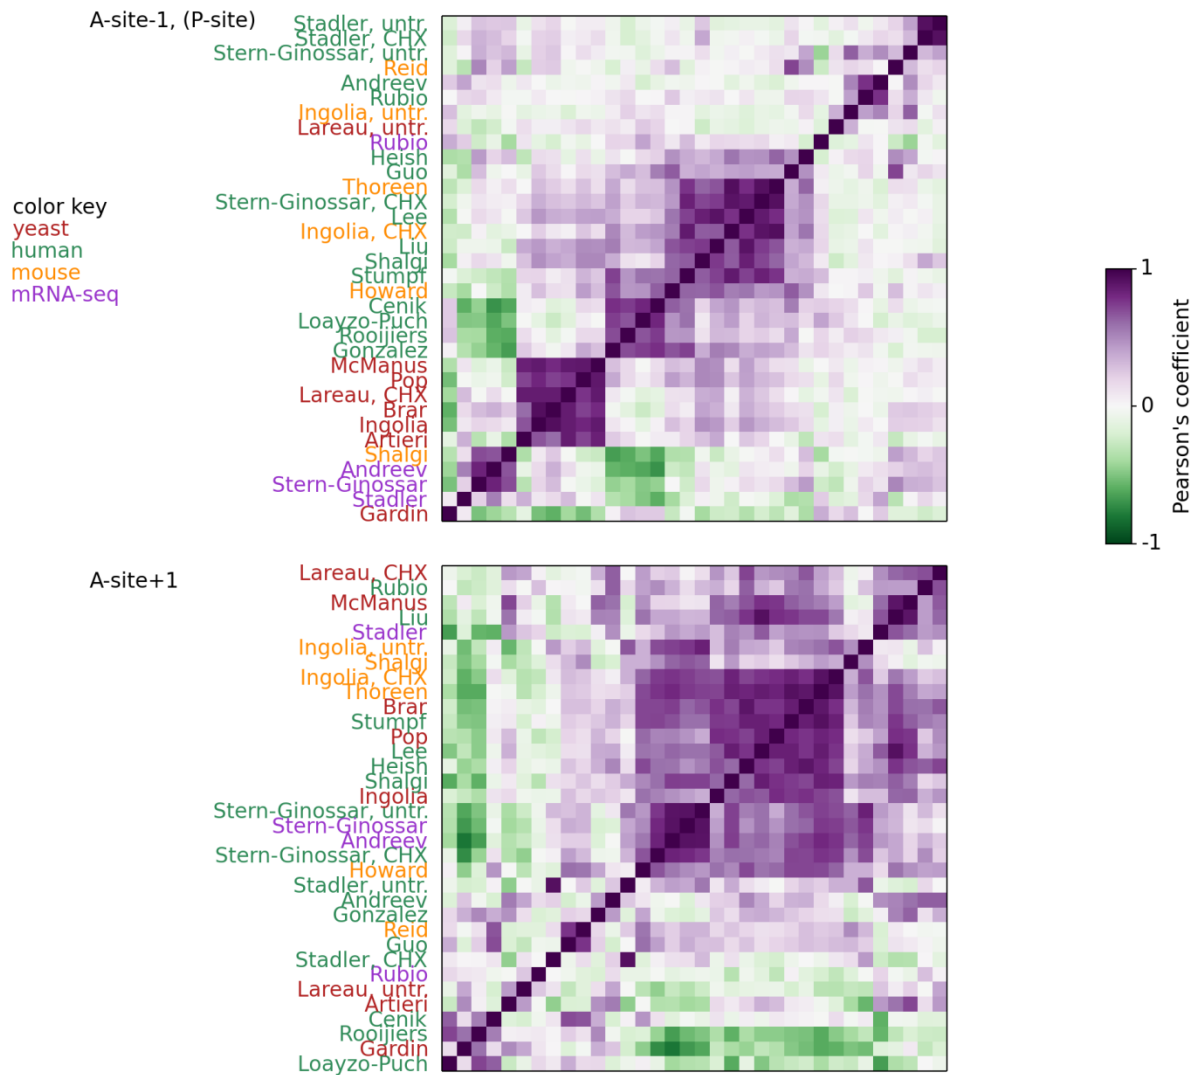

**Supplementary Figure 5. Comparison of the datasets using RUST ratios at the codons adjacent to the A-site.** Heatmaps produced with the pairwise similarity comparison of codon RUST ratios at the P-site (top) and the site immediately 3' of the A-site (bottom), as measured by the Pearson's correlation, for ribo-seq datasets of human (green), yeast (red) and mouse (orange). Also included are human mRNA-seq data (violet). The clustering was created with Scipy using "Euclidean" distance metric with "single" linkage.

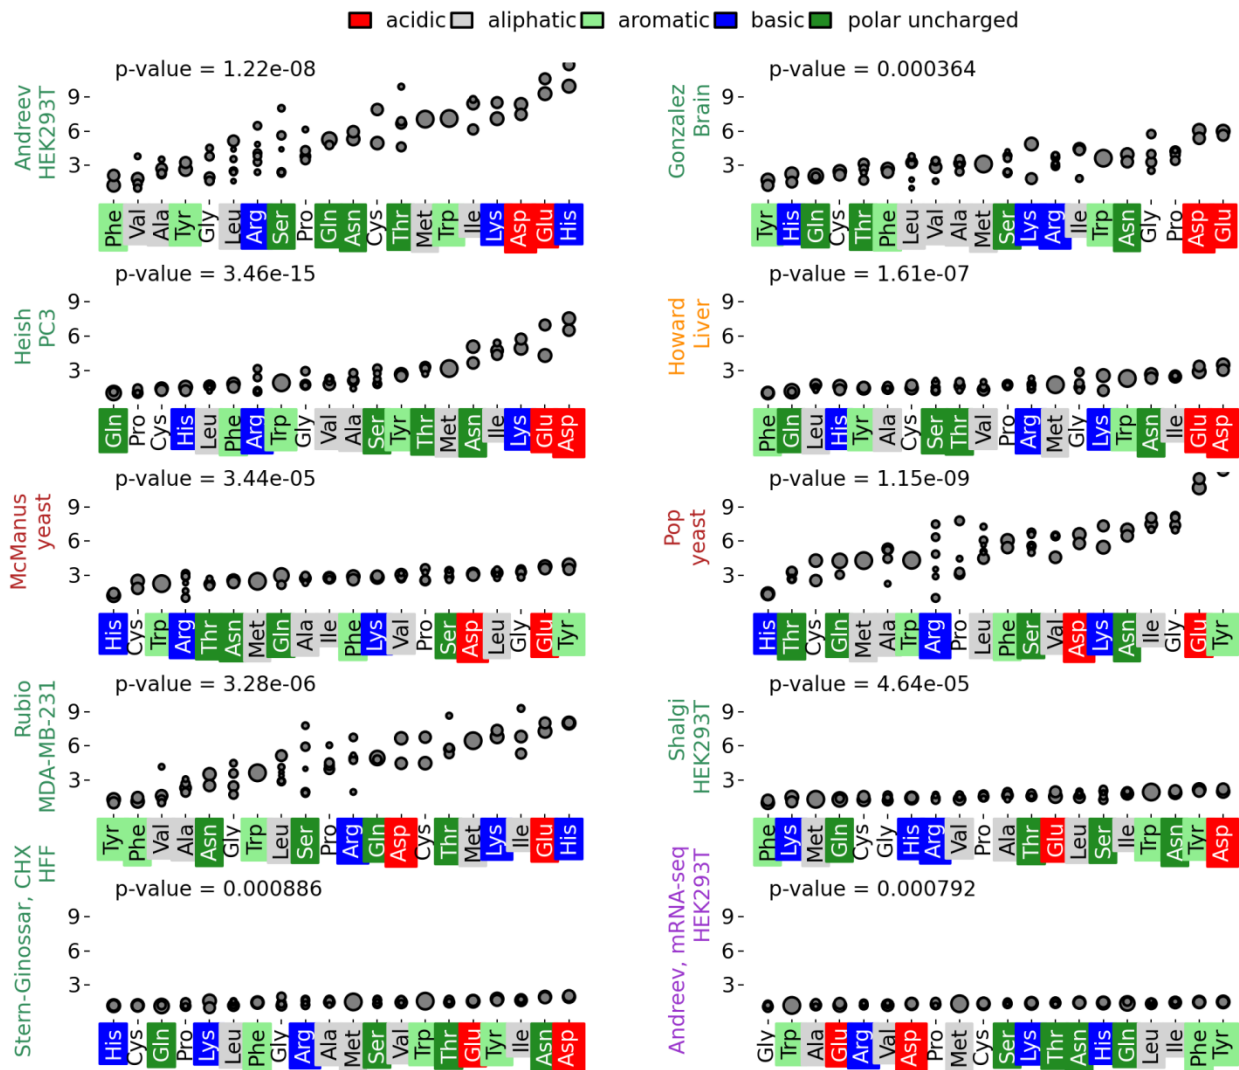

**Supplementary Figure 6. RUST ratios for each of 61 codons in the A-site in different datasets**

Synonymous codons display lower variation of RUST ratios at the A-site than nonsynonymous codons. The RUST ratios, for 9 ribo-seq datasets and 1 mRNA-seq (bottom right) dataset are scaled relative to the minimum. The 61 sense codons are grouped by the amino acid that they encode. ANOVA was used to calculate the p-values to test whether synonymous codons display lower variation than the background. Note that the low p-value obtained for most of the datasets including the mRNA-seq control, even though that as expected the degree of variation for 61 codons is much lower. The results for all samples available at <http://lapti.ucc.ie/rust/>

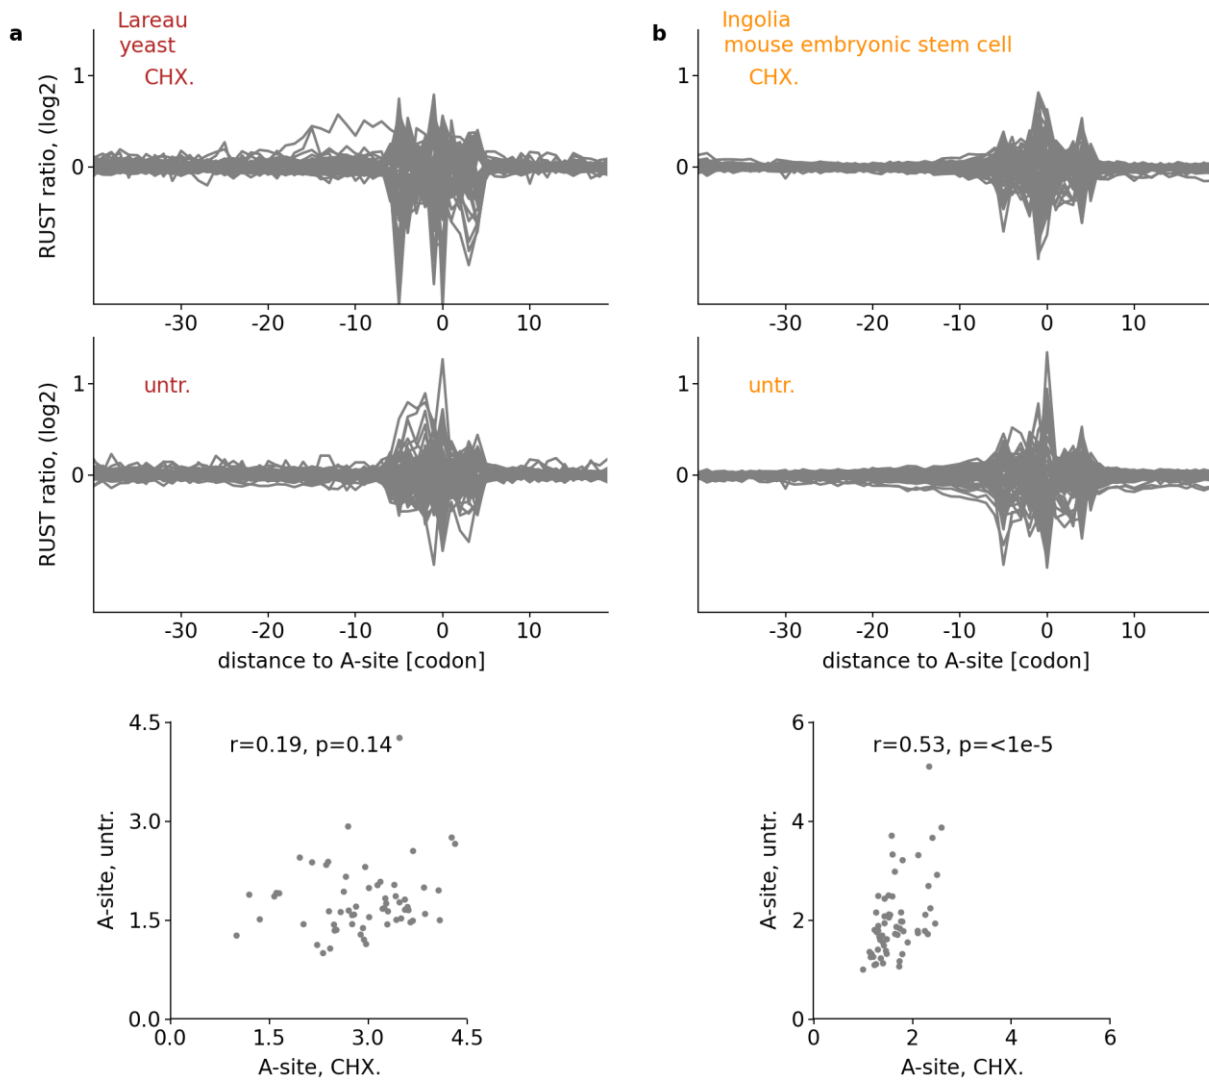

### Supplementary Figure 7. The effect of cycloheximide treatment on footprint libraries

Treatment with cycloheximide can strongly influence the frequency of footprints derived from particular codons. **(a)** The metafootprint profile of cycloheximide treated (top left) and untreated (middle left) obtained for yeast data. The comparison of A-site codons RUST ratios for the two datasets is shown at the bottom. **(b)** Similar to **(a)** except for ribo-seq data obtained from mouse cells.

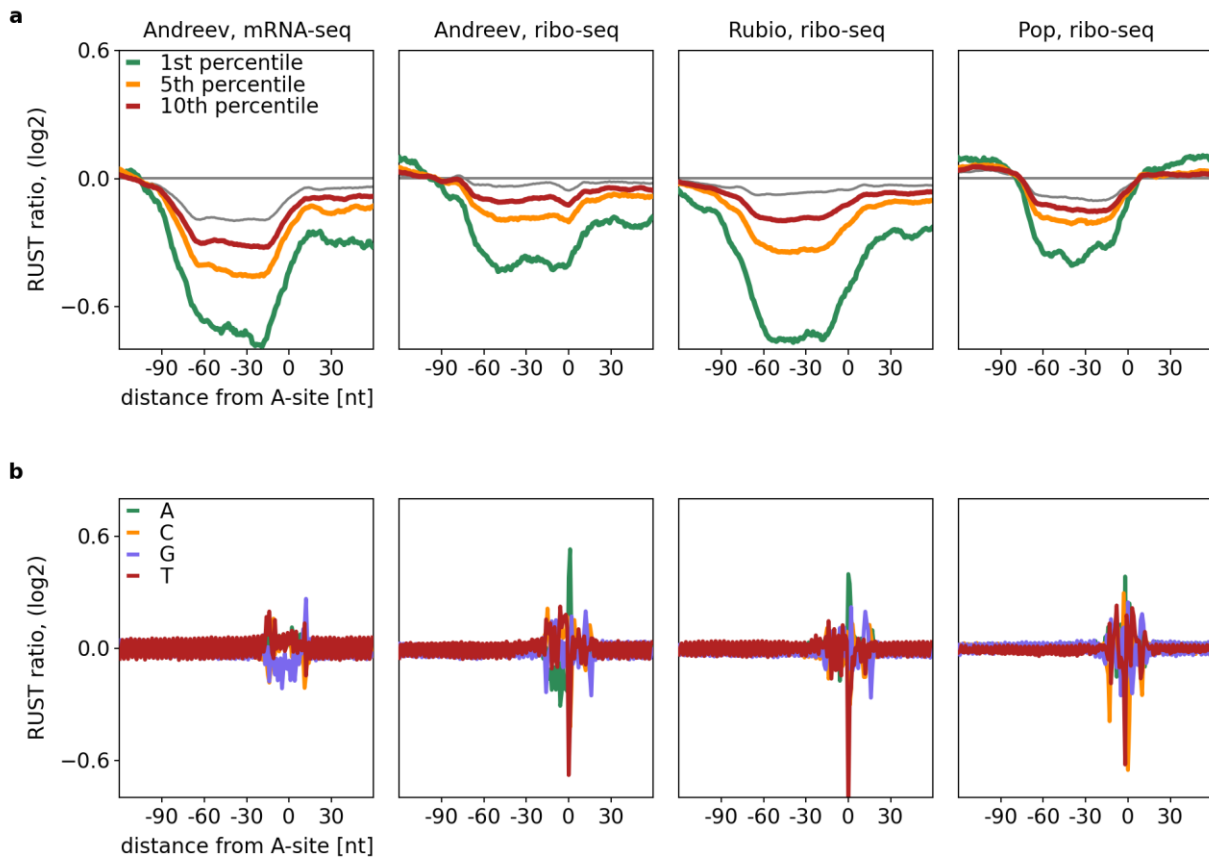

**Supplementary Figure 8. Sequence specific factors affecting the composition of ribo-seq**

**libraries. (a)** The metafootprint analysis for RNA segments potentially forming secondary

structures with different stabilities indicated as free energies percentiles. Each point of the line

indicates the first nucleotide of an 80 nucleotide window used to calculate the free energy. **(b)** The

metafootprint analysis for individual nucleotides. nt used as abbreviation of nucleotide



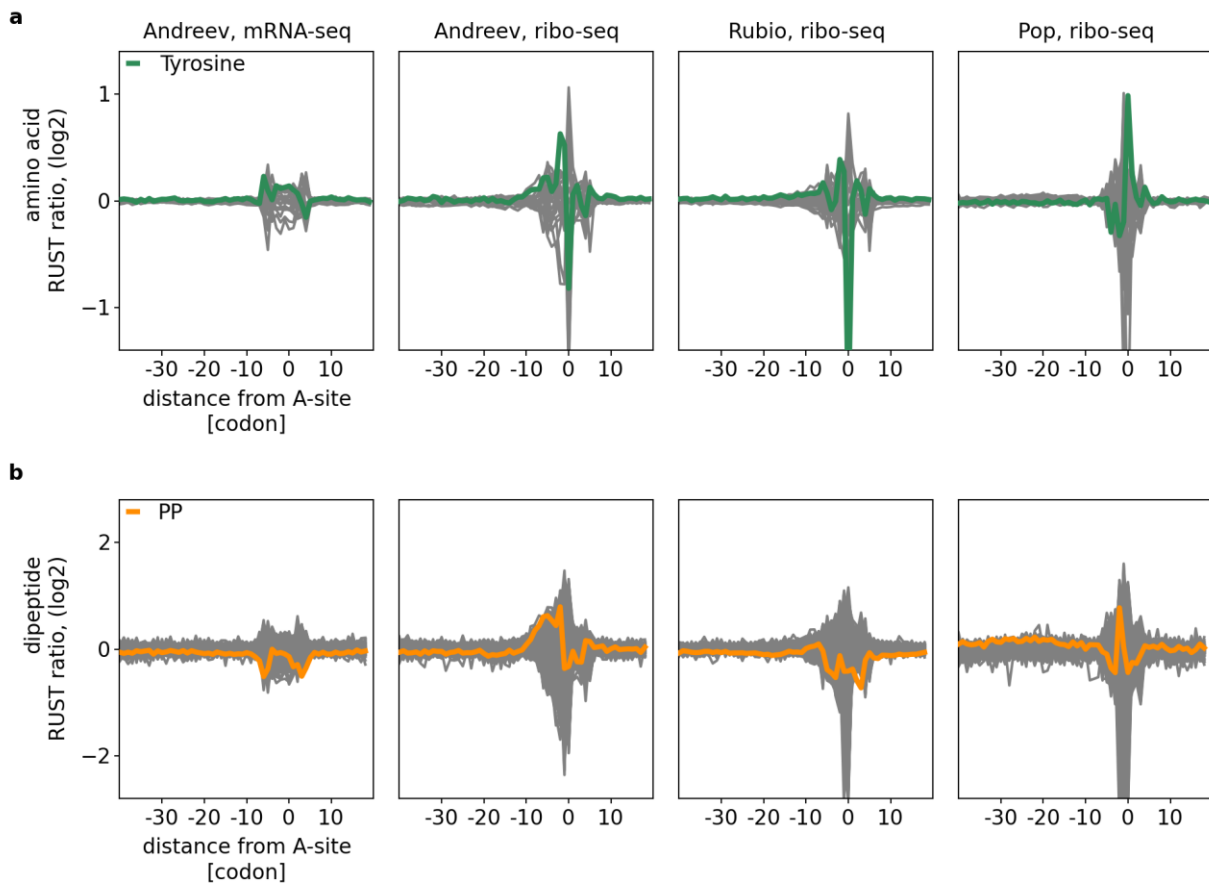

**Supplementary Figure 9. RUST metafootprint profiles for amino acids and dipeptides**

(a) individual amino acids and (b) dipeptides show no evidence of influence of nascent peptide region distal from peptidyl transferase center on ribosome footprint density.

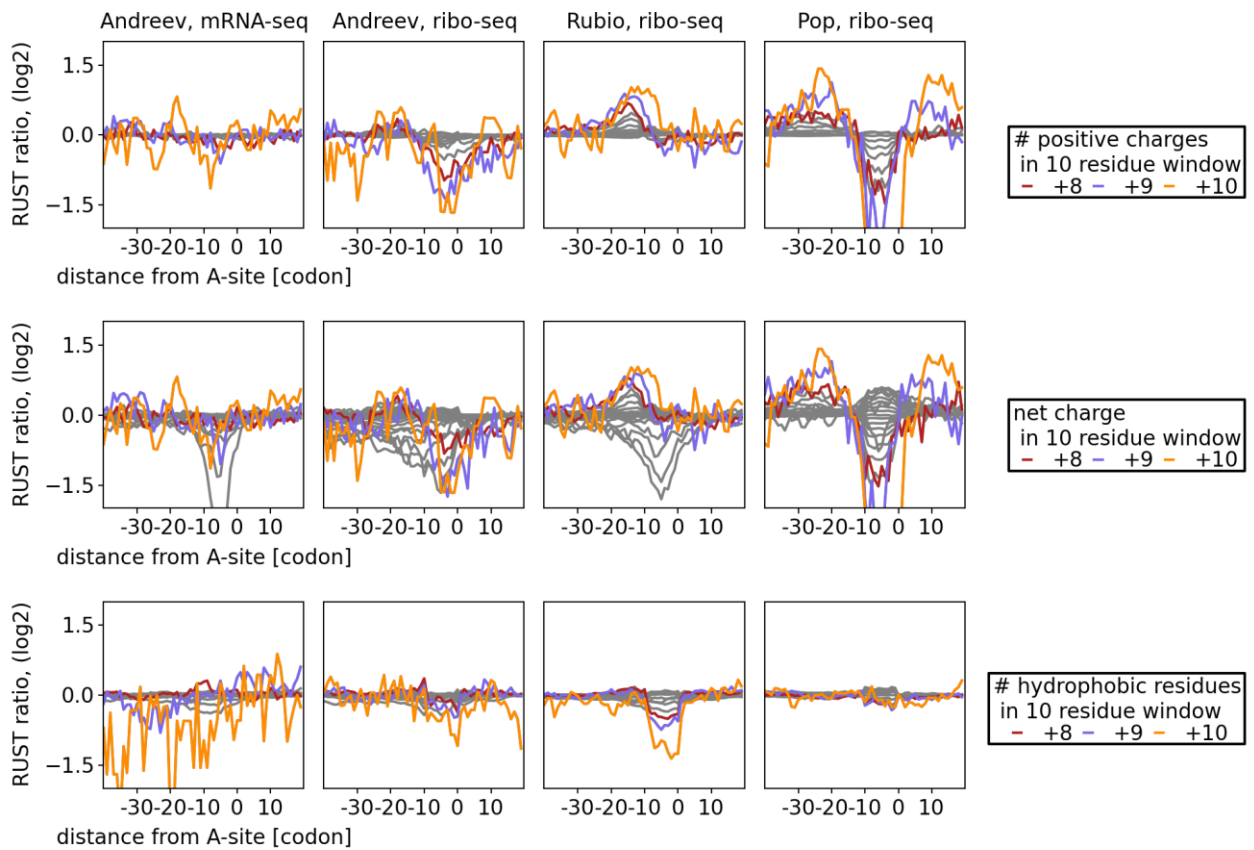

**Supplementary Figure 10. RUST metafootprint profiles for of physicochemical properties of encoded peptides.** The physicochemical properties of the peptides were measured with a 10 codon sliding window (at 1 codon step size). The properties are classified by the number of positively charged amino acids, the net charge and the number of hydrophobic residues within each window. The RUST ratios for 10-codon windows are plotted at the position of the most N-terminal residue in the window. nt used as abbreviation of nucleotide

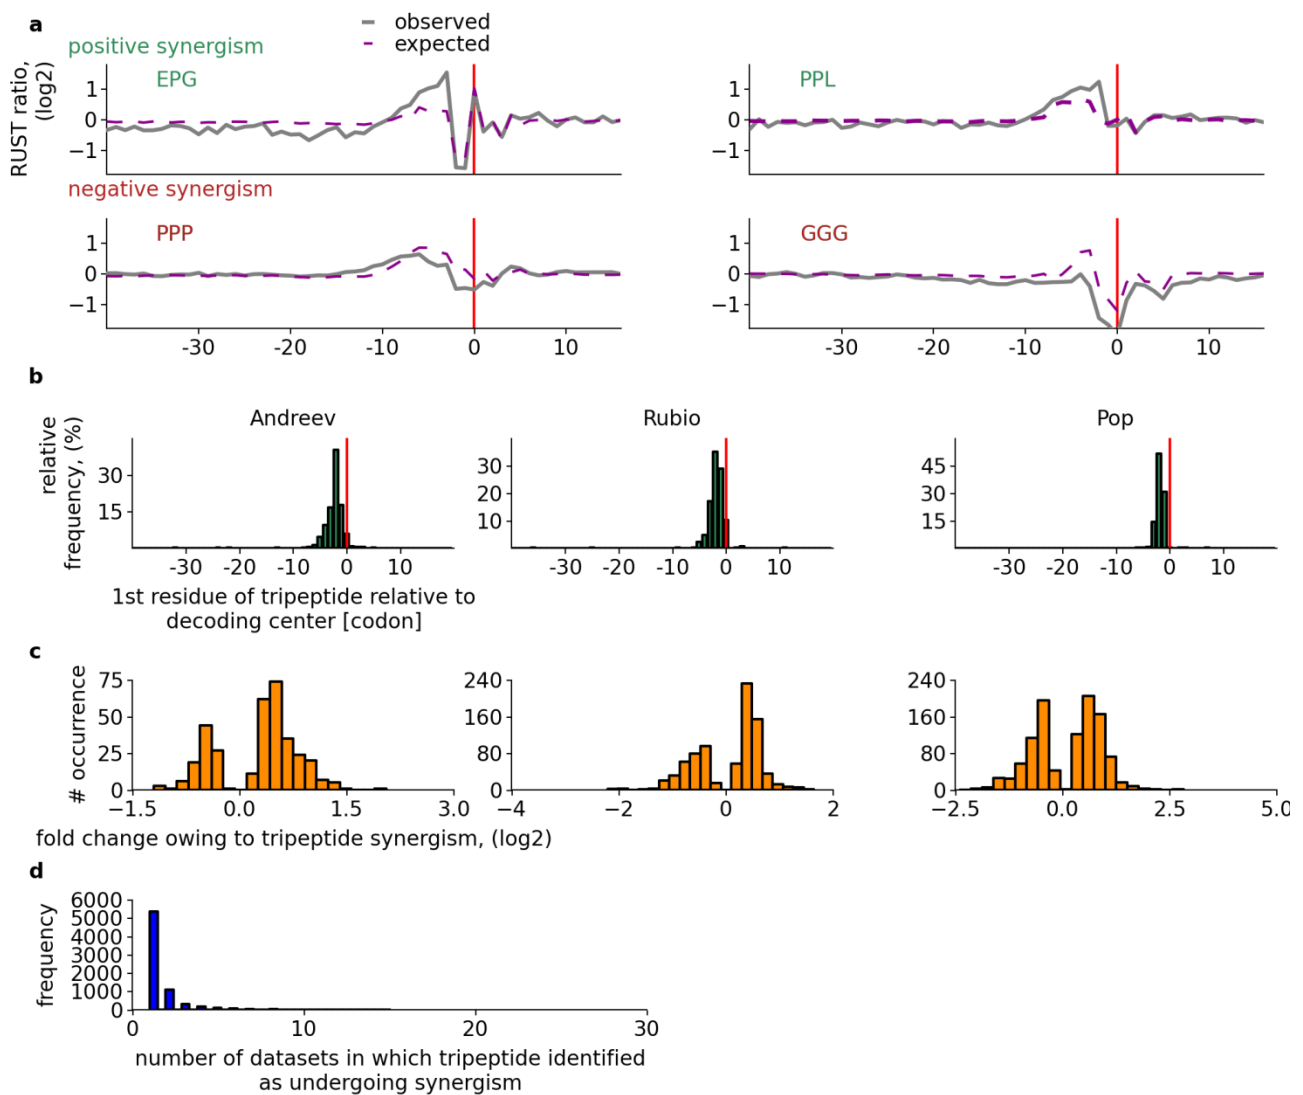

**Supplementary Figure 11. Synergism of adjacent codons have minor influence on ribo-seq read density.** (a) Examples where a significant difference exists between the observed (grey) and expected (purple) RUST ratio for tripeptides. The expected RUST ratio is estimated by the combined effects of individual amino acids. (b) The relative frequencies of synergistic interactions with tripeptides detected across different positions of the ribosome. Stringent standard score 4 (see Methods) was used for identifying such cases. The positions of the N-terminal residues are indicated. (c) The fold change between the expected-to-observed RUST ratios for cases of synergistic interactions with tripeptides. Motifs with a log<sub>2</sub> change close to 0 were not included as they did not pass the standard score threshold. (d) Distribution of synergetic tripeptides detected in 30 datasets. Most of synergetic tripeptides are specific to a single dataset.

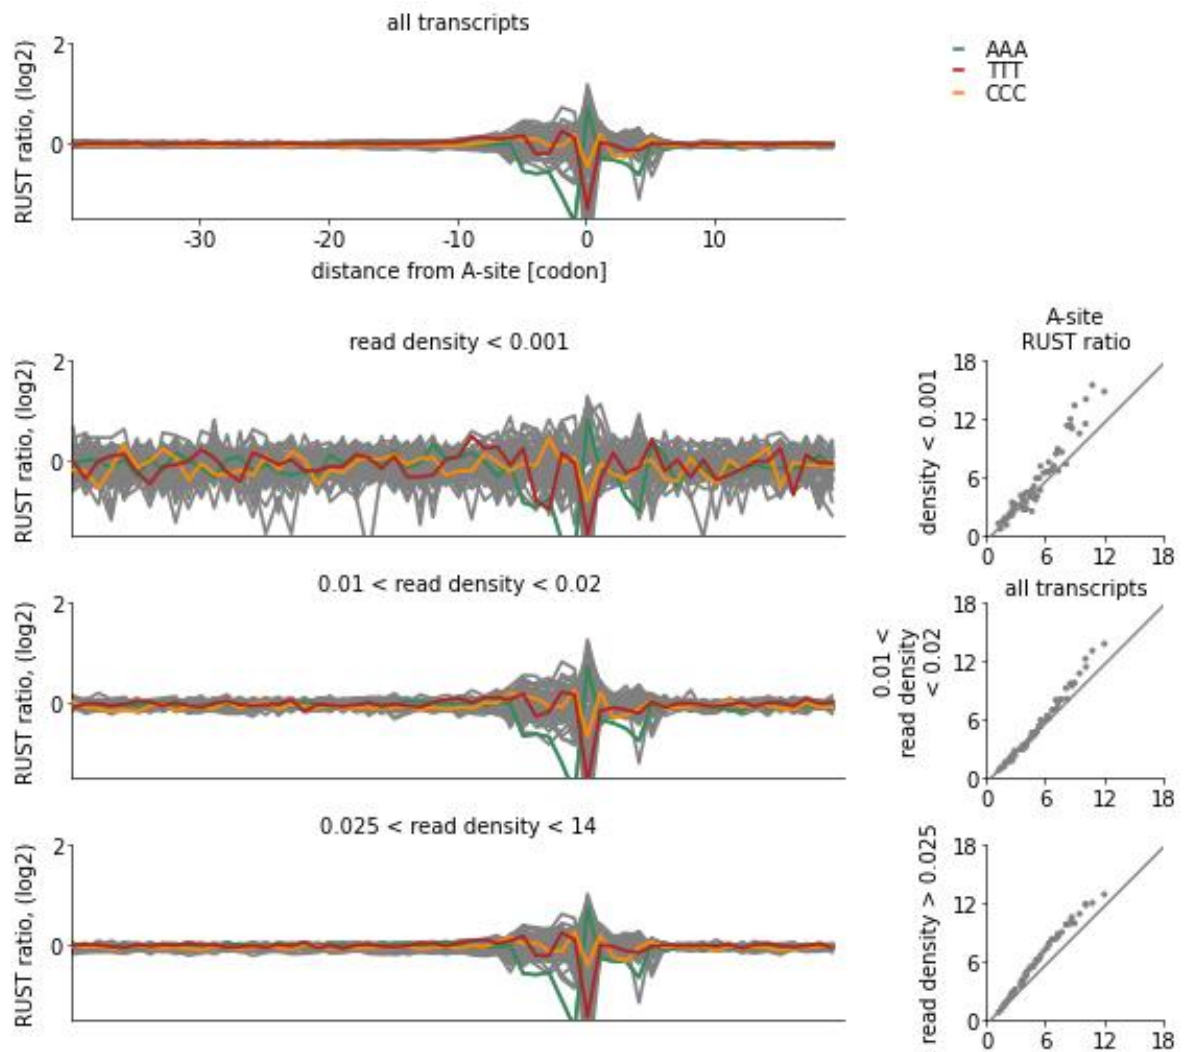

**Supplementary Figure 12. The effect of sequencing coverage and expression levels**

RUST profile produced with a subsets of genes grouped by the averaged footprint density (indicated). The RUST metafootprint profile for the entire dataset (top) followed by other metafootprint profiles each produced with ~10% of the total number of expressed genes. The correlations between the A-site codon RUST ratios from the total dataset and its subsets are displayed on the right.

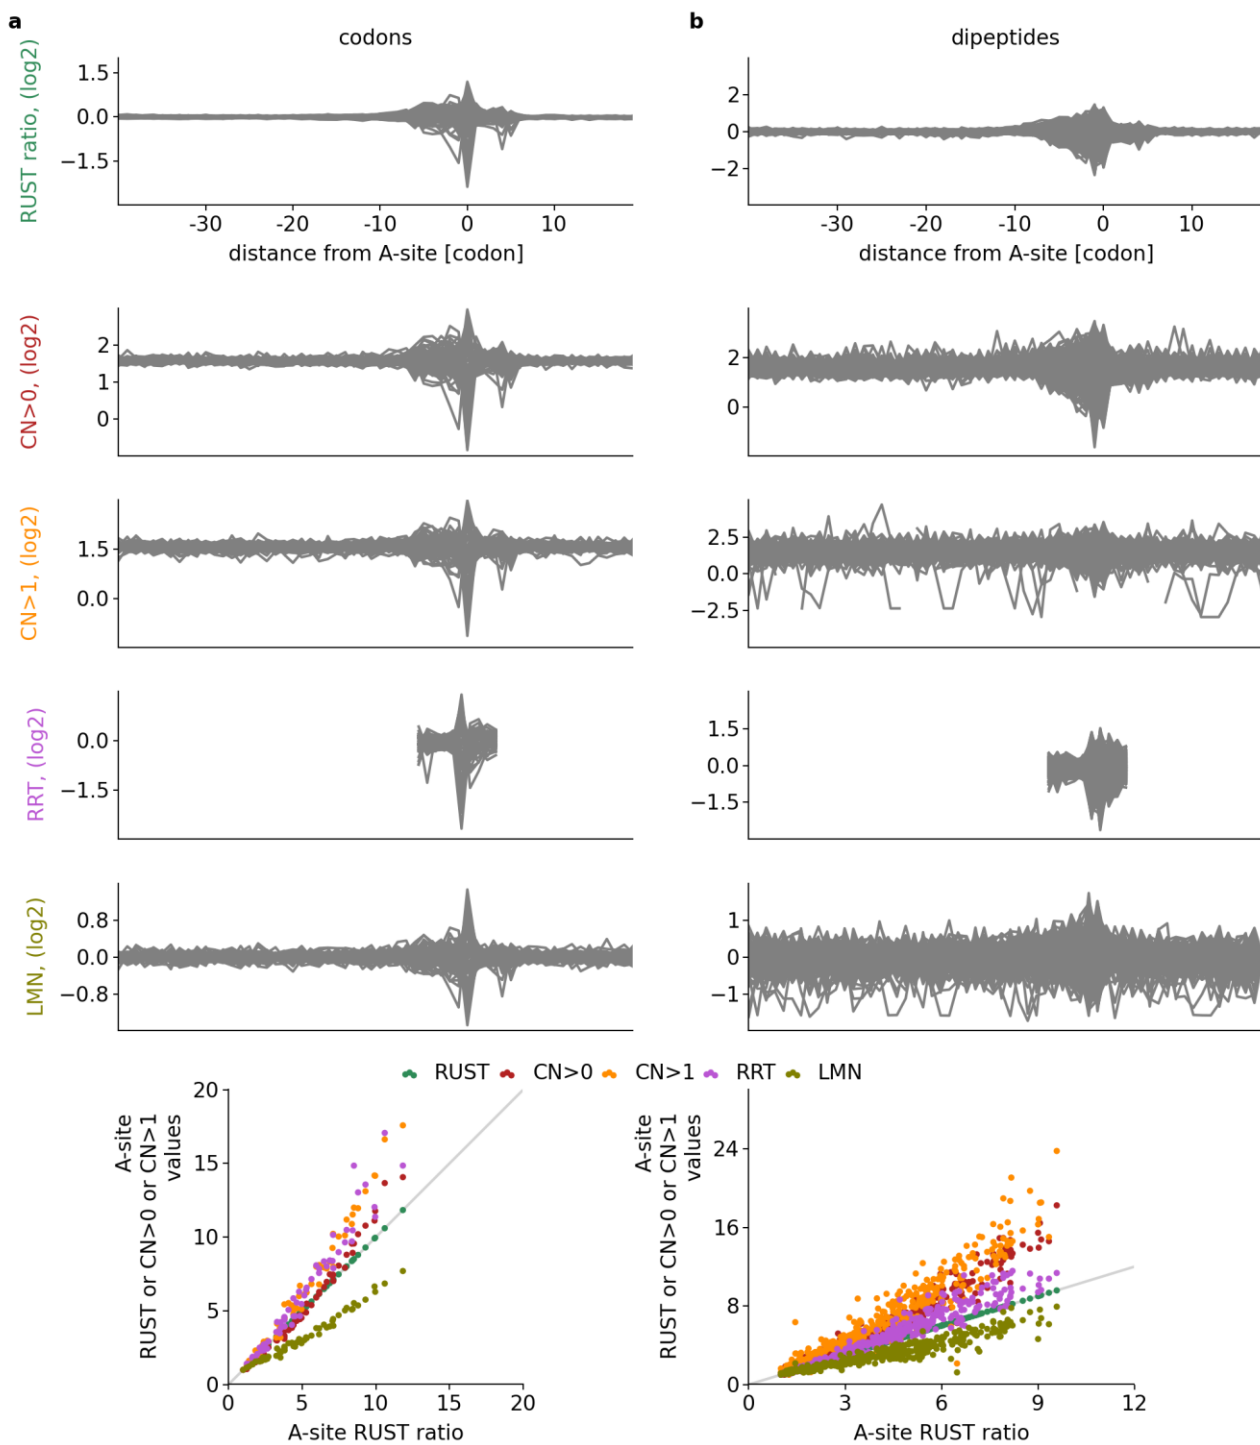

**Supplementary Figure 13. RUST, CN, RRT and LMN metafootprint profiles obtained with real data.** (a) The metafootprint profiles for A-site codons obtained using different normalization techniques. The correlation of the decoding center between RUST and other methods is shown at the bottom. (b) The metafootprint profiles of dipeptides. Both panels show that RUST metafootprint profiles have a higher signal to noise ratio.

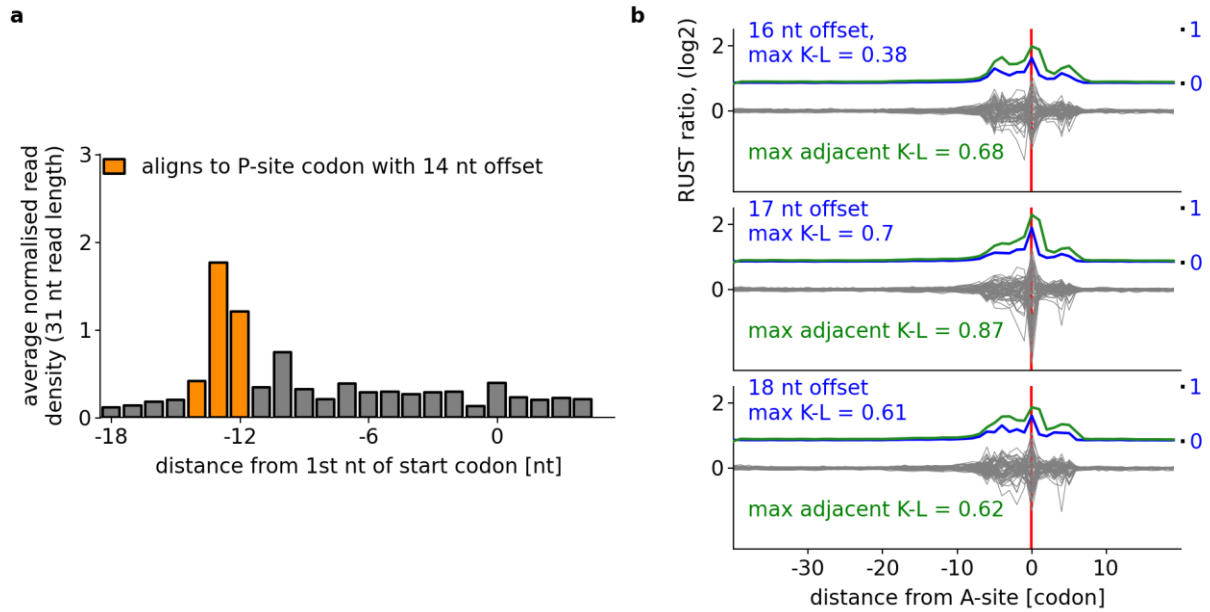

### Supplementary Figure 14. Identifying offset to the A-site

(a) Metagene profile at the initiation site for 31 nucleotides long footprints. A 14 nucleotide offset from the 5' end (orange) is the most likely distance to the P-site. (b) Metafootprint profiles of RUST ratios obtained with various offsets. The K-L divergence (blue line) is greatest at the A-site using a 17 nucleotide offset. In situations where the P-site has large influence on decoding rate the K-L divergence for two adjacent codons (green) is a more accurate approach for identifying correct offset to the decoding center (P- and A-sites). The data used for this figure are from “Andreev” dataset. nt used as abbreviation of nucleotide

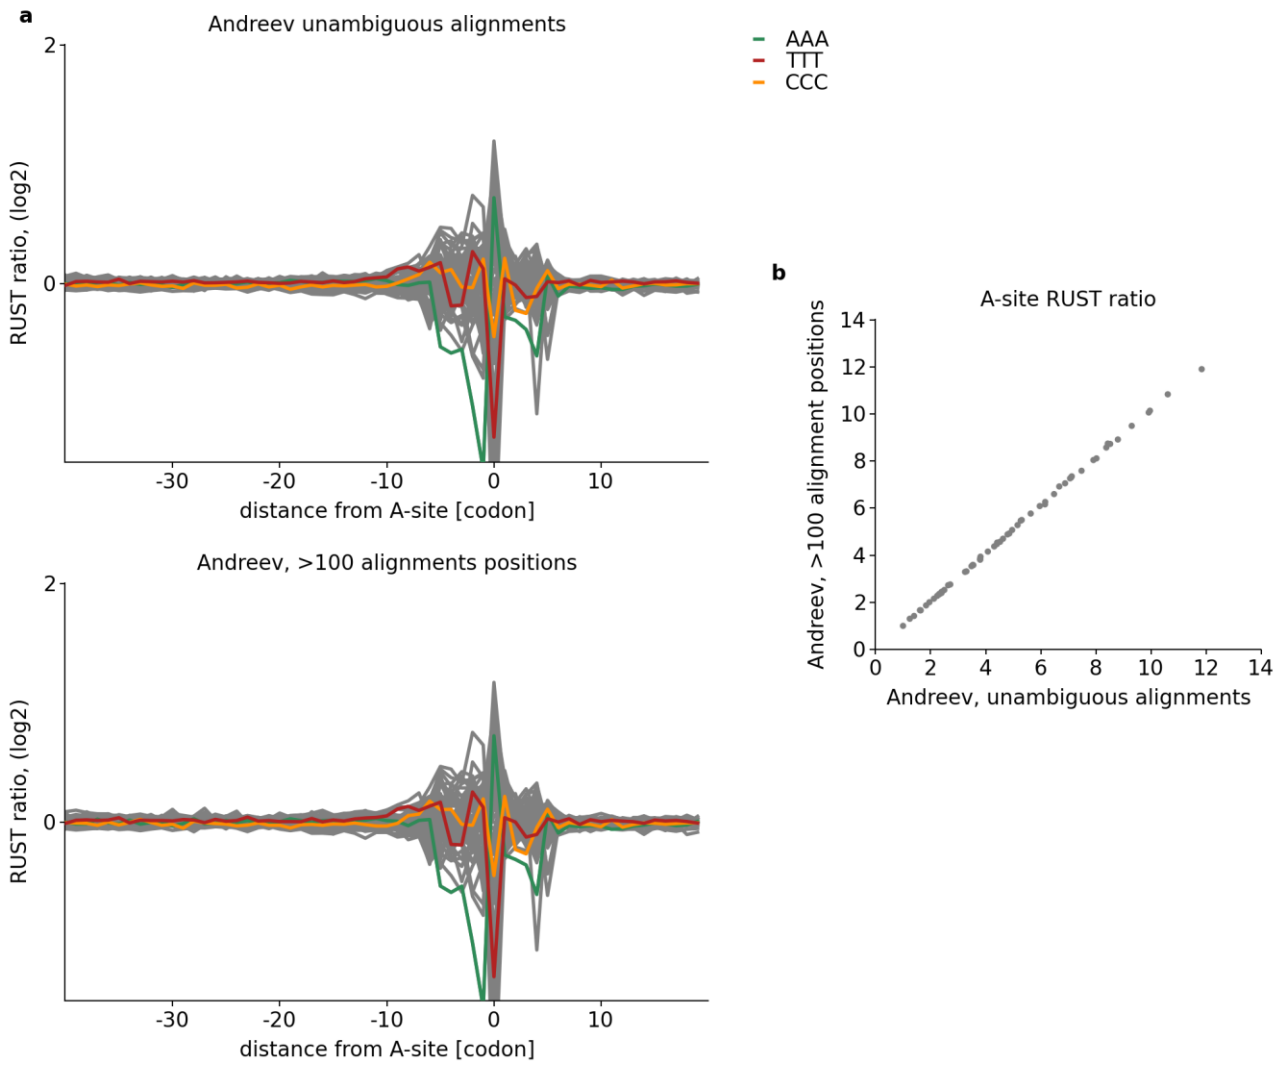

**Supplementary Figure 15. The effect of ambiguous reads on RUST metafootprint profiles**

(a) The metafootprint profiles obtained from unambiguous reads only (top left) or including reads that align to less than 100 positions (bottom left) are nearly identical. (b) The comparison of A-site codon RUST ratios inferred from datasets with and without ambiguous reads inclusion.

Supplementary Table 1

|                        | Description    | PubMed Id | SRA file(s)                       | Cell line/Tissue               | Aligned reads | Read length | A-site offset | Reads used to produce profile |
|------------------------|----------------|-----------|-----------------------------------|--------------------------------|---------------|-------------|---------------|-------------------------------|
| <b>Human</b>           | Andreev        | 25621764  | SRR1173909,SR1                    | HEK293T                        | 9678014       | 31          |               | 17 1418111                    |
|                        | Cenik          | 26297486  | SRR1803149                        | EBV-transformed lymphoblastoid | 4300083       | 30          |               | 15 228628                     |
|                        | Gonzalez       | 25122893  | SRR1562539                        | Brain                          | 12349880      | 29          |               | 16 1679952                    |
|                        | Guo            | 20703300  | SRR057512                         | HeLa                           | 8613493       | 30          |               | 14 1277108                    |
|                        | Heish          | 22367541  | SRR403883                         | PC3                            | 4074203       | 29          |               | 17 530051                     |
|                        | Lee            | 22927429  | SRR618771                         | HEK293                         | 10695143      | 29          |               | 16 1042369                    |
|                        | Liu            | 23290916  | SRR619083                         | HEK293                         | 13579417      | 29          |               | 16 1171199                    |
|                        | Loayzo-Puch    | 23594524  | SRR627620                         | BJ fibroblast                  | 13429315      | 29          |               | 15 1940357                    |
|                        | Rooijers       | 24301020  | SRR935448                         | BJ fibroblast                  | 16613559      | 29          |               | 16 569247                     |
|                        | Rubio          | 25273840  | SRR1573934                        | MDA-MB-231                     | 61819405      | 32          |               | 17 6470387                    |
|                        | Shalgi         | 23290915  | SRR648667                         | HEK293T                        | 8796151       | 32          |               | 17 945078                     |
|                        | Stadler, CHX   | 22045228  | SRR407637                         | HeLa                           | 11956304      | 32          |               | 17 1870693                    |
|                        | Stadler, untr. | 22045228  | SRR407643                         | HeLa                           | 12555437      | 32          |               | 17 977131                     |
|                        | Stern-Ginossar | 23180859  | SRR609197                         | human foreskin fibroblasts     | 7641866       | 30          |               | 15 1979525                    |
|                        | Stern-Ginossar | 23180859  | SRR592961                         | human foreskin fibroblasts     | 11228476      | 31          |               | 17 900948                     |
|                        | Stumpf         | 24120665  | SRR970561                         | HeLa                           | 23870096      | 31          |               | 17 1183436                    |
| <b>Mouse</b>           | Howard         | 23696641  | SRR826795                         | Liver                          | 40385932      | 34          |               | 17 5001378                    |
|                        | Ingolia, CHX   | 22056041  | SRR315601                         | Embryonic stem cell            | 4721388       | 31          |               | 17 447215                     |
|                        | Ingolia, untr. | 22056041  | SRR315616                         | Embryonic stem cell            | 6146735       | 31          |               | 17 680077                     |
|                        | Reid           | 25215492  | SRR1066893                        | Embryonic fibroblast           | 5832921       | 33          |               | 14 853619                     |
|                        | Shalgi         | 23290915  | SRR649752                         | 3T3                            | 2685761       | 30          |               | 14 477120                     |
|                        | Thoreen        | 22552098  | SRR449467                         | Embryonic fibroblast           | 4053303       | 30          |               | 16 483481                     |
| <b>Yeast</b>           | Artieri        | 25294246  | SRR1049093                        |                                | 38082586      | 28          |               | 15 7866955                    |
|                        | Brar           | 22194413  | SRR387871                         |                                | 8429595       | 28          |               | 17 1288175                    |
|                        | Gardin         | 25347064  | SRR1506632                        |                                | 8912388       | 29          |               | 14 1025309                    |
|                        | Ingolia        | 19213877  | SRR014374,SRR014375, SRR014376    |                                | 1264121       | 29          |               | 17 271584                     |
|                        | Lareau, CHX    | 24842990  | SRR1363415,SRR1363416             |                                | 8007112       | 28          |               | 16 2321224                    |
|                        | Lareau, untr.  | 24842990  | SRR1363412,SRR1363413, SRR1363414 |                                | 11249812      | 29          |               | 17 2393769                    |
|                        | McManus        | 24318730  | SRR948555                         |                                | 13632476      | 29          |               | 17 3089629                    |
|                        | Pop            | 25538139  | SRR1688547                        |                                | 9676033       | 29          |               | 17 2321278                    |
| <b>Human, mRNA-seq</b> | Andreev        | 25621764  | SRR1173911, SR                    | HEK293T                        | 20165353      | 27          |               | 17 903043                     |
|                        | Rubio          | 25273840  | SRR1573935                        | MDA-MB-231                     | 84575026      | 50          |               | 17 11802212                   |
|                        | Stadler        | 22045228  | SRR407636                         | Hela                           | 10031834      | 36          |               | 17 789626                     |
|                        | Stern-Ginossar | 23180859  | SRR592963                         | human foreskin fibroblasts     | 10274713      | 50          |               | 17 260792                     |
